# Supplementary material for: An Updated Parameterization of the Unstable Atmospheric Surface Layer in WRF Modeling System
Source: Copernicus journal article supplement (doi:10.5194/gmd-2024-3), 2024-02-27
Supplement: Supplementary file 1 [file gmd-2024-3-supplement.pdf]

## Supplementary Material

### An Updated Parameterization of the Unstable Atmospheric Surface Layer in WRF Modeling System

Prabhakar Namdev<sup>1</sup>, Maithili Sharan<sup>1</sup>, Piyush Srivastava<sup>2</sup>, and Saroj K Mishra<sup>1</sup>

<sup>1</sup>Centre for Atmospheric Sciences, Indian Institute of Technology Delhi, New Delhi, 110016,  
India

<sup>2</sup>Centre of Excellence for Disaster Management and Mitigation, Indian Institute of Technology  
Roorkee, Roorkee, 110016, India

#### Corresponding Author

**Prabhakar Namdev**

Centre for Atmospheric Sciences,  
Indian Institute of Technology Delhi,  
Hauz Khas, New Delhi-110016

Email: [Prabhakarnmdv587@gmail.com](mailto:Prabhakarnmdv587@gmail.com)

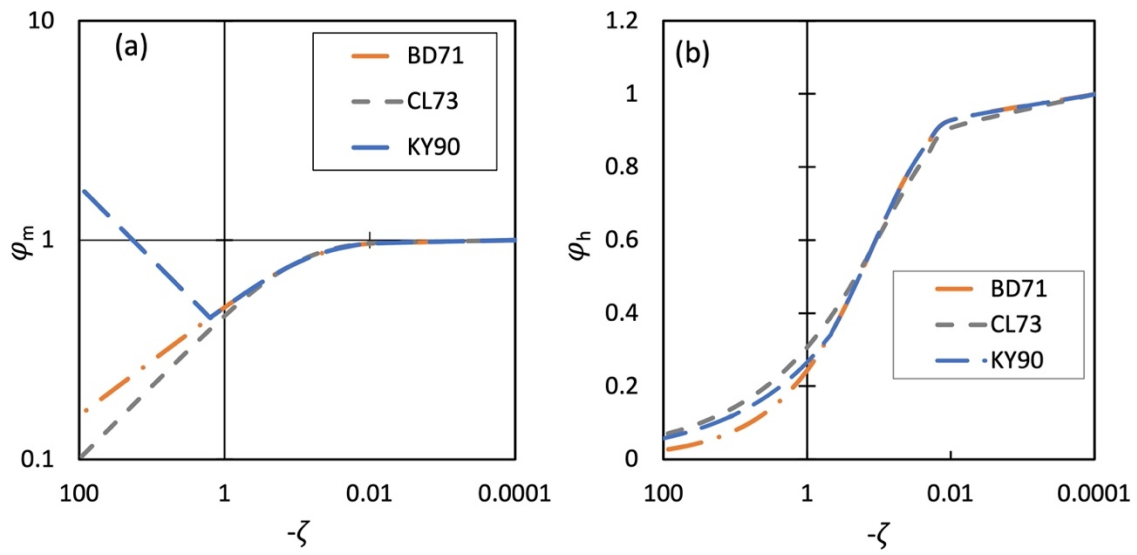

**Figure S1.** Variation of different functional forms of  $\varphi_m$  and  $\varphi_h$  with respect to  $-\zeta$  utilized in this study based on the different classes.

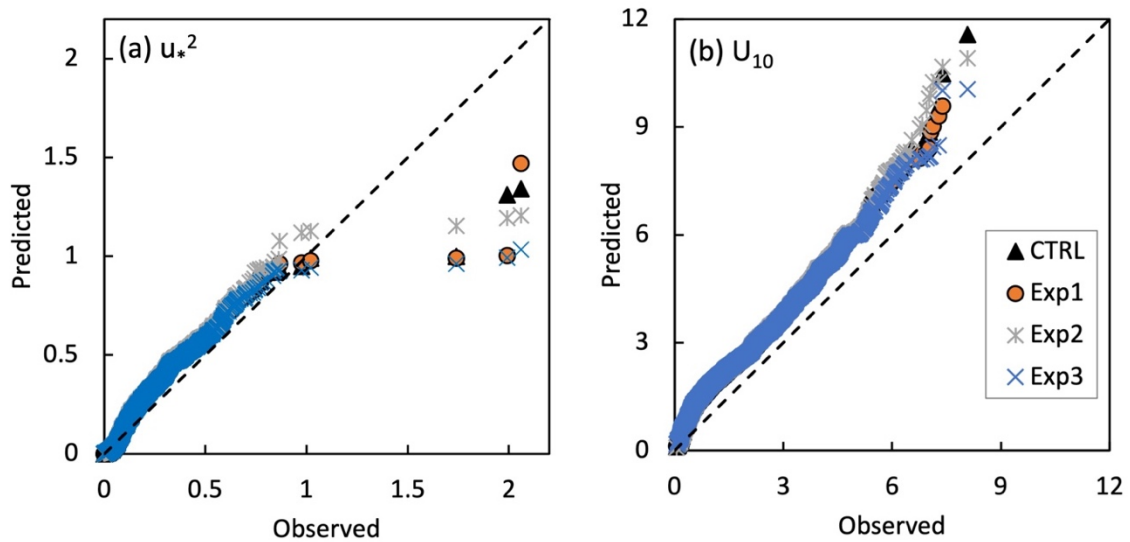

**Figure S2.** Q-Q plot for model simulated (a)  $u_*^2$ , and (b)  $U_{10}$  from different experiments and CTRL simulation with respect to the observational data derived from the flux tower at Ranchi (India) during MAM season (2009).

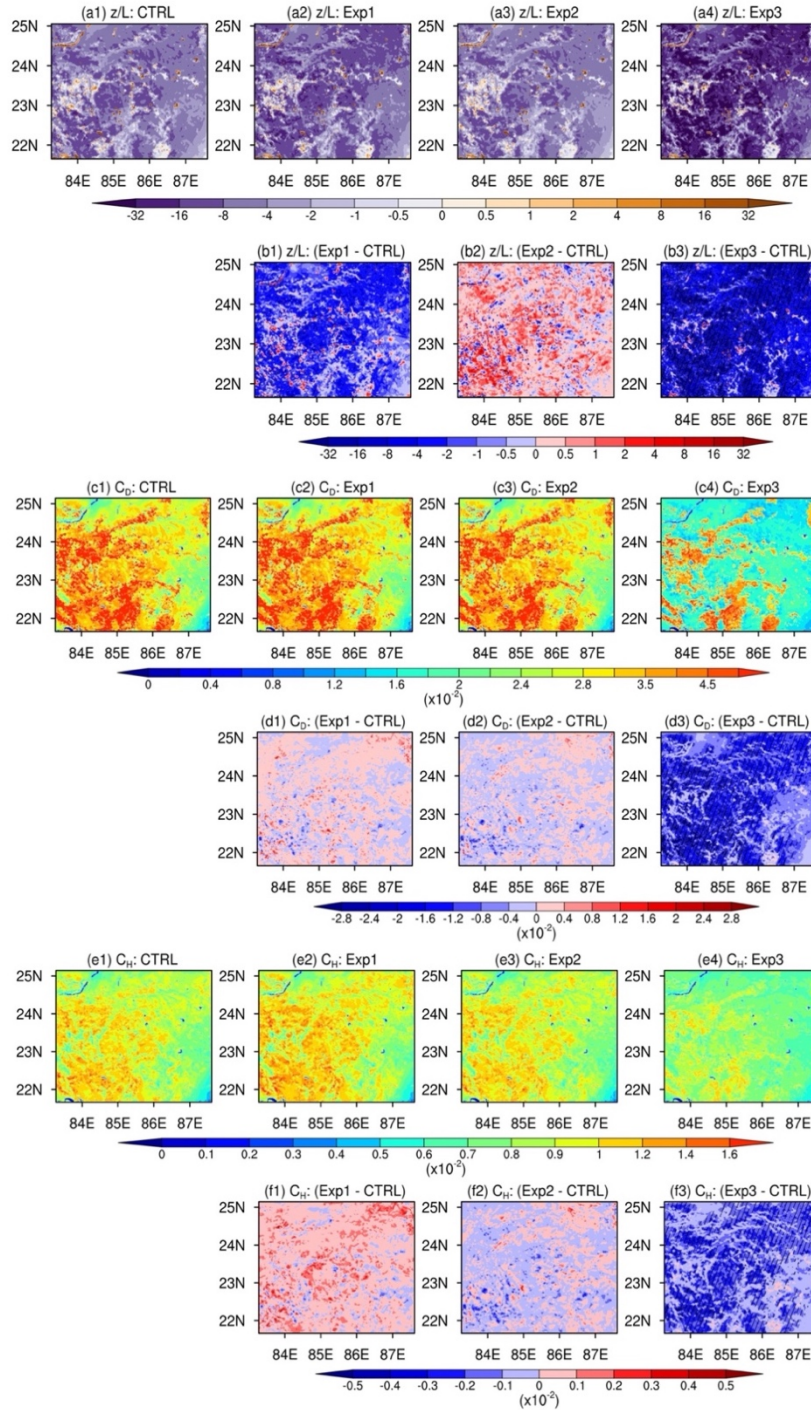

**Figure S3.** Mean spatial distribution of model simulated  $\zeta$  (1<sup>st</sup> row),  $C_D$  (2<sup>nd</sup> row) and  $C_H$  (3<sup>rd</sup> row) from different experiments and their differences with respect to CTRL simulation averaged during strong unstable conditions (hours during daytime in which  $\zeta$  is smaller than  $-10$ ) for whole simulation period. Hatched regions show significant differences at 95% confidence level in experiments with respect to CTRL simulation.

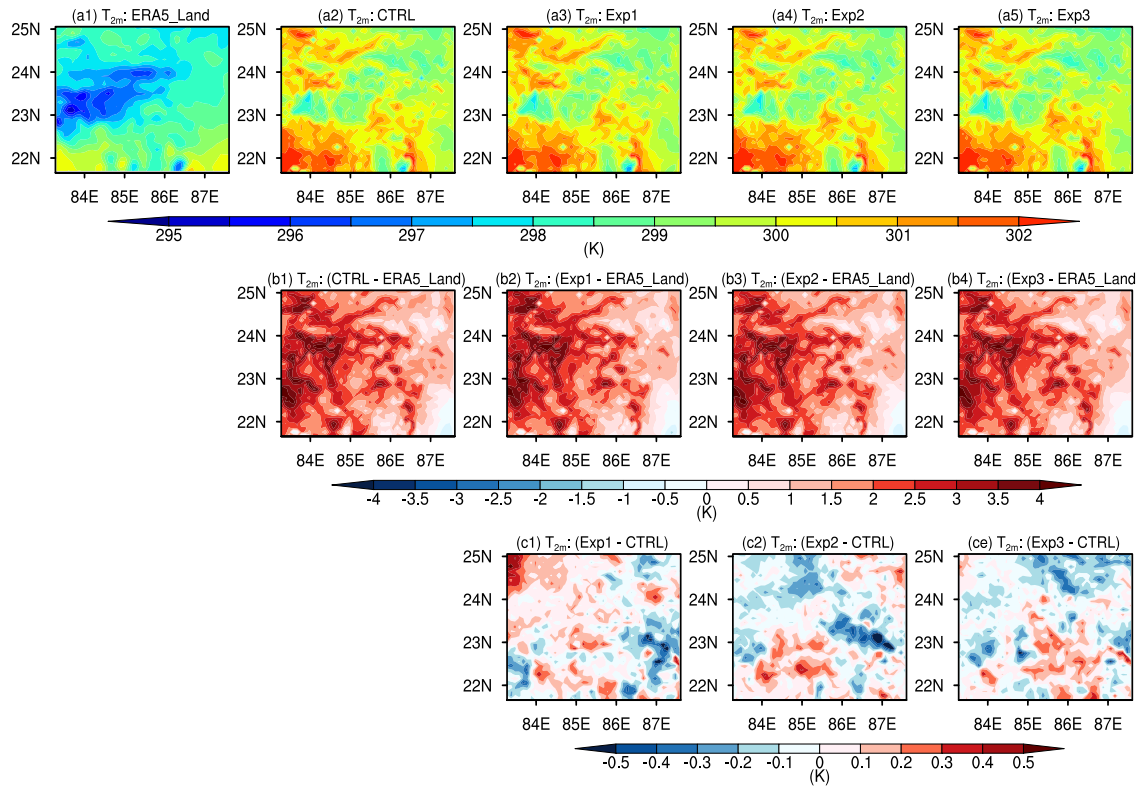

**Figure S4.** Mean spatial distribution of  $T_{2m}$  from ERA5 land reanalysis (a1) and simulated using different experiments (a2-a5) and their differences with respect to ERA5 land reanalysis data (b1-b4) averaged during strong unstable regime (hours during daytime in which  $\zeta$  is smaller than  $-10$ ) for whole simulation period. The differences between different experiments and CTRL simulation are shown in last row (c1-3).

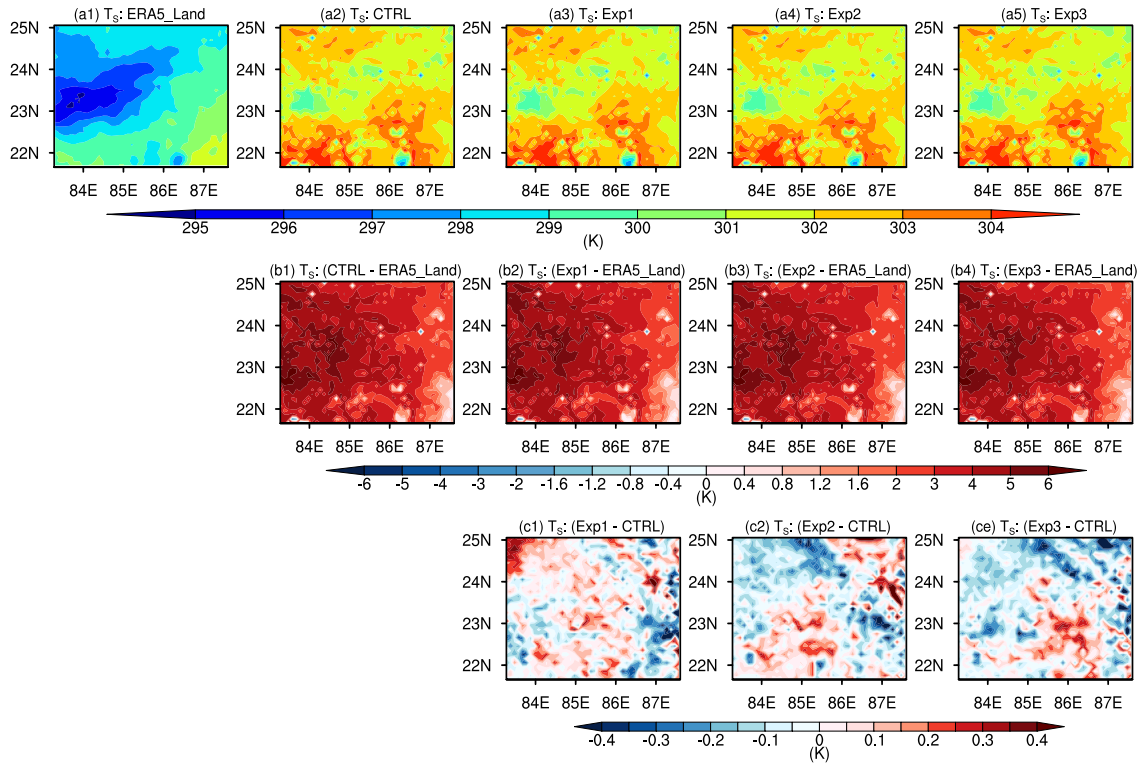

**Figure S5.** Same as Figure S4 but for  $T_s$ .

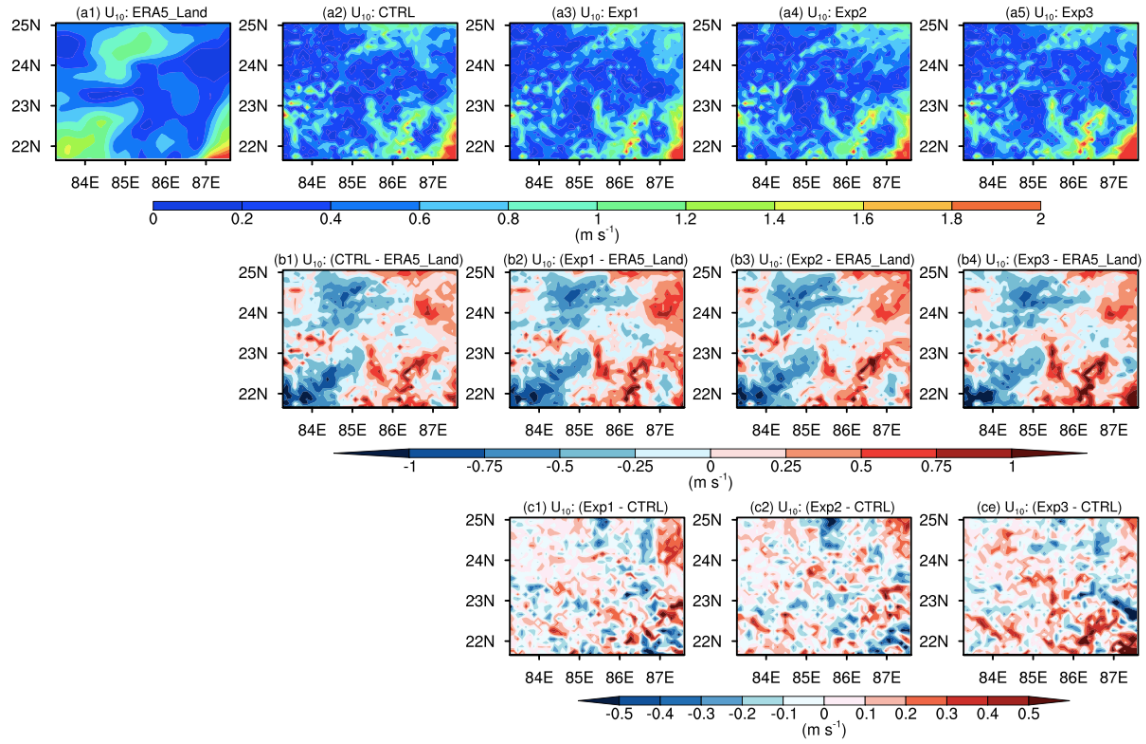

**Figure S6.** Same as Figure S4 but for  $U_{10}$ .

| MAM                                                  |      | Bias (%) | RMSE   | PCC   |
|------------------------------------------------------|------|----------|--------|-------|
| <b>SHF (<math>\text{W m}^{-2}</math>)</b>            | CTRL | 7.089    | 37.373 | 0.471 |
|                                                      | Exp1 | 7.040    | 37.416 | 0.471 |
|                                                      | Exp2 | 7.124    | 37.439 | 0.469 |
|                                                      | Exp3 | 7.171    | 37.419 | 0.475 |
| <b>LHF (<math>\text{W m}^{-2}</math>)</b>            | CTRL | -33.543  | 50.698 | 0.385 |
|                                                      | Exp1 | -33.539  | 50.699 | 0.384 |
|                                                      | Exp2 | -33.584  | 50.722 | 0.387 |
|                                                      | Exp3 | -33.550  | 50.706 | 0.384 |
| <b>T<sub>2m</sub> (K)</b>                            | CTRL | 0.244    | 1.264  | 0.720 |
|                                                      | Exp1 | 0.242    | 1.258  | 0.720 |
|                                                      | Exp2 | 0.244    | 1.263  | 0.720 |
|                                                      | Exp3 | 0.246    | 1.267  | 0.719 |
| <b>T<sub>s</sub> (K)</b>                             | CTRL | 0.506    | 2.754  | 0.503 |
|                                                      | Exp1 | 0.508    | 2.755  | 0.501 |
|                                                      | Exp2 | 0.510    | 2.761  | 0.504 |
|                                                      | Exp3 | 0.502    | 2.752  | 0.512 |
| <b>U<sub>10</sub> (<math>\text{m s}^{-1}</math>)</b> | CTRL | 32.283   | 0.544  | 0.899 |
|                                                      | Exp1 | 32.123   | 0.543  | 0.898 |
|                                                      | Exp2 | 31.177   | 0.535  | 0.894 |
|                                                      | Exp3 | 32.057   | 0.539  | 0.911 |

**Table S1.** Comparison statistics for SHF ( $\text{W m}^{-2}$ ), LHF ( $\text{W m}^{-2}$ ), T<sub>2m</sub> (K), T<sub>s</sub> (K), and U<sub>10</sub> ( $\text{m s}^{-1}$ ) simulated using different experiments together with CTRL simulation with respect to ERA5 land reanalysis data averaged during daytime for the entire simulation period. The mean bias (%), pattern correlation coefficient (PCC), and root mean square error (RMSE) are shown.
